# Supplementary material
Source: PubMed Central journal article supplement (PMC2630067)
Supplement: 0809964106_0809964106SI.pdf [file 0809964106_0809964106SI.pdf]

# Supporting Information

Khazina and Weichenrieder 10.1073/pnas.0809964106

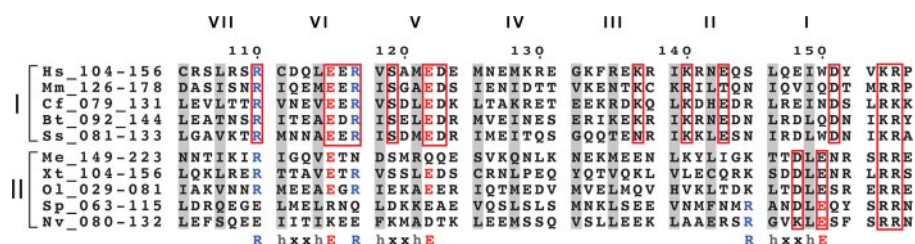

**Fig. S1.** Conservation of trimerization motifs in the N-terminal coiled-coil (cc) domain of type II NLR ORF1p proteins. The seven C-terminal heptad repeats of the cc domain are numbered I-VII starting from the C-terminal side. The hydrophobic positions one and four of each repeat are shaded in gray. Highly conserved residues are boxed in red. Surface residues only conserved in placental mammals (group I) or only outside of placental mammals (group II) are boxed separately. The highly conserved RhxxxhE sequence motifs promoting a trimeric parallel coiled-coil are indicated below [see: Kammerer RA *et al.* (2005)]. A conserved trimerization motif controls the topology of short coiled coils. *Proc Natl Acad Sci USA* 102:13891–13896]. h, hydrophobic; x any amino acid. Gene identifiers: Hs, *Homo sapiens* (gi:307098); Mm, *Mus musculus* (gi:198644); Cf, *Canis familiaris* (gi:116175029); Bt, *Bos taurus* (gi:66734172); Ss, *Sus scrofa* (gi:148645275); Me, *Macropus eugenii* (gi:151302550); Xt, *Xenopus tropicalis* (gi:85740540); Ol, *Oryzias latipes* (gi:3746501), Sp, *Strongylocentrotus purpuratus* (gi:111740418); Nv, *Nematostella vectensis* (gi:149338150).

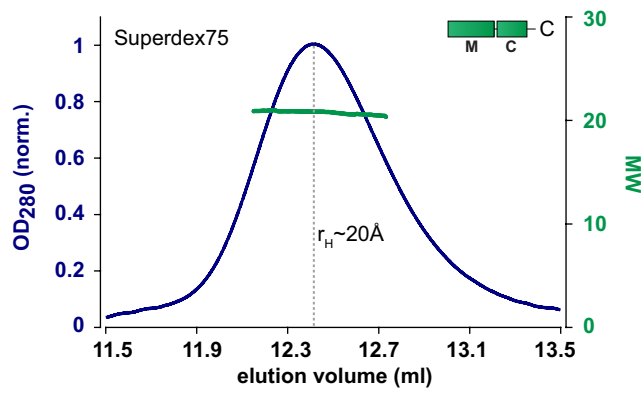

**Fig. S2.** Monomeric state of the human L1 ORF1p RRM-CTD double domain. Size-exclusion chromatography and MALLS support a rather globular ( $r_H \approx 20 \text{ \AA}$ ), monomeric state of this 21-kDa fragment. (*Inset*) Schematic representation of the construct.

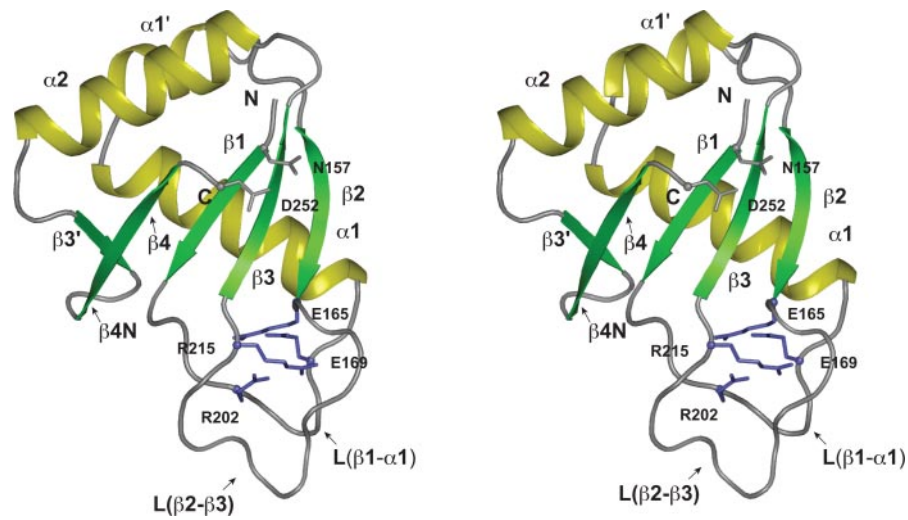

**Fig. S3.** Crystal structure of the RRM domain of human L1 ORF1p (stereo). Ribbons representation with  $\alpha$ -helices in yellow and  $\beta$ -strands in green. Blue sticks, side chains forming the conserved salt-bridges; gray sticks, side chains of the N-terminal N157 and of the C-terminal D252.

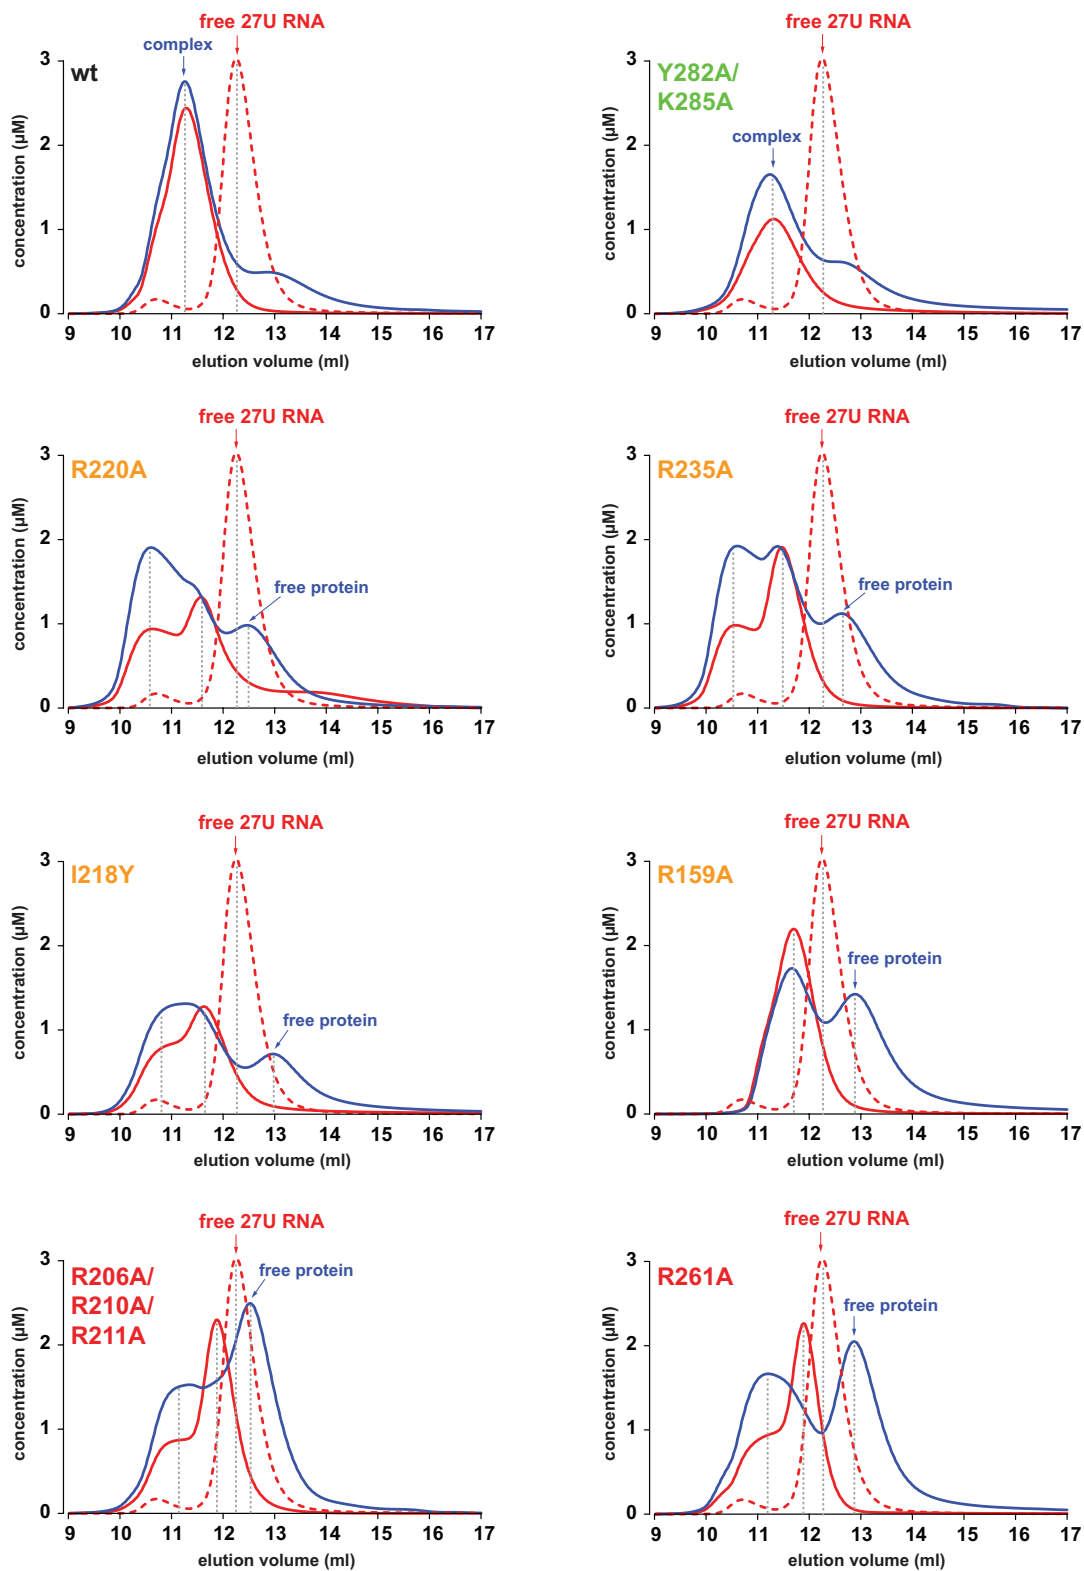

**Fig. S4.** Mutational analysis of the RNA-binding properties of the human L1 ORF1p RRM-CTD double domain. Size-exclusion chromatography was done with 27-mer poly(U) RNA (27U RNA, 40  $\mu$ M at start, red lines) in the absence (dashed lines) or in the presence (solid lines) of RRM-CTD (hL1ORF1p-MC<sup>H6</sup>) protein variants (50  $\mu$ M at start, blue solid lines). Elution volumes of the free components and of the complexes are indicated by arrows and dashed gray lines, while apparent concentrations are calculated from the relative absorption properties of the components. The respective mutations are indicated. Colors signal strong (red), moderate (orange), and negligible (green) effects on RNA-binding.

**Table S1. Identification of RRM domains in selected NLR-ORF1p proteins**

| Name                 | Species | gi-number | Query residues* | Probability (%) | E value | P value | PDB-ID: Residues | No. of RRM |
|----------------------|---------|-----------|-----------------|-----------------|---------|---------|------------------|------------|
| Type I NLR ORF1p     |         |           |                 |                 |         |         |                  |            |
| I clade              |         |           |                 |                 |         |         |                  |            |
| I                    | Dr      | 20146016  | 081–233         | 96.1            | 0.13    | 3.3E-06 | 2adc_A: 102–211  | 2          |
| Jockey clade         |         |           |                 |                 |         |         |                  |            |
| Jockey               | Dm      | 157823    | 233–404         | 97.4            | 0.0045  | 1.1E-07 | 1cvj_A: 235–401  | 2          |
| TART-A               | Dm      | 48596445  | 564–717         | 97.0            | 0.027   | 6.7E-07 | 2qfj_A: 031–210  | 2          |
| Het_A                | Dm      | 14030851  | 471–623         | 97.1            | 0.022   | 5.4E-07 | 2qfj_A: 031–208  | 2          |
| R1 clade             |         |           |                 |                 |         |         |                  |            |
| pilger               | Dm      | 9369277   | 235–408         | 97.1            | 0.0023  | 5.8E-08 | 2dgx_A: 326–396  | 1          |
| Tad1 clade           |         |           |                 |                 |         |         |                  |            |
| Tad1_1               | Nc      | 409759    | 176–349         | 97.5            | 0.00094 | 2.4E-08 | 2dny_A: 250–343  | 1          |
| L1(plant) clade      |         |           |                 |                 |         |         |                  |            |
| ATLINE1              | At      | 12321249  | 082–258         | 97.0            | 0.021   | 5.4E-07 | 1fje_B: 082–219  | 2          |
| L1(Tx) clade         |         |           |                 |                 |         |         |                  |            |
| Tx1L                 | Xl      | 214844    | 141–241         | 96.1            | 0.0088  | 2.2E-07 | 2o3d_A: 149–240  | 1          |
| Type II NLR ORF1p    |         |           |                 |                 |         |         |                  |            |
| L1(vertebrate) clade |         |           |                 |                 |         |         |                  |            |
| L1.3                 | Hs      | 307098    | 157–252         | 77.5            | 8.3     | 0.00021 | 3bs9_A: 164–237  | 1          |
| L1(Tx) clade         |         |           |                 |                 |         |         |                  |            |
| L1(Tx)               | Nv      | 149795606 | 133–221         | 73.9            | 9.9     | 0.00025 | 2nlw_A: 134–216  | 1          |
| CR1 clade            |         |           |                 |                 |         |         |                  |            |
| CR1                  | Nv      | 149844706 | 076–174         | 48.8            | 14      | 0.00035 | 2ghp_A: 076–158  | 1          |
| CR1                  | Sp      | 111740418 | 116–200         | 23.1            | 88      | 0.0022  | 2dgp_A: 117–212  | 1          |
| Type III NLR ORF1p   |         |           |                 |                 |         |         |                  |            |
| CR1 clade            |         |           |                 |                 |         |         |                  |            |
| Q                    | Ag      | 432429    | 193–294         | 93.9            | 0.1     | 2.6E-06 | 2dng_A: 193–287  | 1          |
| T                    | Ag      | 159642    | 215–312         | 93.0            | 0.16    | 3.9E-06 | 2dng_A: 220–305  | 1          |

Identification was done with HHpred. See Söding J, Biegert A, Lupas AN (2005). The HHpred interactive server for protein homology detection and structure prediction. *Nucleic Acids Res* 33:W244–W248. Hs, *Homo sapiens*; Dm, *Drosophila melanogaster*; Dr, *Danio rerio*; Nc, *Neurospora crassa*; At, *Arabidopsis thaliana*; Ag, *Anopheles gambiae*; Xl, *Xenopus laevis*; Sp, *Strongylocentrotus purpuratus*; Nv, *Nematostella vectensis*.

\*Amino acids are counted starting with the first methionine.

Table S2. Query sequences used for Table S1

|                                           |                                                                                                                                                                                      |
|-------------------------------------------|--------------------------------------------------------------------------------------------------------------------------------------------------------------------------------------|
| Type I NLR ORF1p                          |                                                                                                                                                                                      |
| I-DR_Dr_gi_20146016_(081-233)             | VFVRLVQEGATFEDWSPQLTKALYKEIGEVRCAKLRNGCLLVSCKDEAQQKKAIVNKINGKVKC-SEVYDRKLIRGVITGIPVSESLNNVIEGITNAKIKEAKRLKTRWNGAICDSLIMLTFDETKLPDKVFIGY-MSYEVKMYIPPPVR                               |
| Jockey_Jockey_Dm_gi_157823_(233-404)      | KPPAICVPSVSDPVTLERALNLSTGSSNYIRISRFVGSRIYTANPDARFATVAVKELNKLNCQFWHHQLKE-EKPYRVVVLKGIHANVPSSQIEQAFSDHGYEVLNIYCPKSDWKNIQVNEEDNEATKNFKTRQNLFYI-NLKQGPNVKESLKITRLGRYRVTVRATRREKELLQ      |
| Jockey_TART-A_Dm_gi_48596445_(564-717)    | IFLSNIQIIPLEIKLNYKAGVNSFTTKSELGNIRIQAKTMDAYKAIQNVLLGANIPLHSHQPKSAKGFQ-IVIRHLHQSTPTKWIESQLQDIGIATKFIAMQFRDTRNPMRIHEVEVVPKADGSHLKVLLKSLGGQ-TVKVERKRVSKDPTQ                             |
| Jockey_HeT-A_Dm_gi_14030851_(471-623)     | ILVNDVKEIVLLEKLNNTAGVSSYTTAIEGNGVRIQAKDMTAYNKIKEVLVANGLPFTNQPKSERG-FRVIIRHLHHSTPCSWIVEELLKLGQARFVRNMTNPATGGPMRMFEVEIVMAKDGSHDKILSLKQI-GGQRVDIERKNRTREP                               |
| R1_pilger_(waldo)_Dm_gi_9369277_(235-408) | AKVKPKRLRKKPEALILKKTGEVTSYDMLRKMKAEPSTLEFGKHVRKIRRTQQGELLELEGKASEVIPS-FKNELEATLKEIASVRTGAHRTALICSGLDETTTAQDLHNSLVSQFQIRLEPEDVRGLRRRRDGTQI-ASVLMCANDAIAVINRGVTVGWSRCAIQDVRPIR         |
| R1_TRAS1_Bm_gi_940388_(202-378)           | RQPPKCTTLHSIMVSSKDENETGDGILTELKRTASEDEGWVVRVERVRKIKDRKIIMSyrTEEERTKATQ-RLKKSEGELVVEIKNDPLILYNVLKMHSDLDLQKALRSKNKDLFRNLNKEDDRIEVKYYKKSARN-PHTHHVVLKVSPTIWNRAALSMGSLHIDIQPVVRVADQTPLVQ |
| Tad1_Tad11_Nc_gi_409759_(176-349)         | RQLTIKATIAAEFVNRSNEDTKTTLATCLGKKKPLIVRAATRMPTTGDYVIVFDEPRTTRWCWRNQA-WAKEVFGPDAFITMSTVGVLVRGVPWDSVDNYTTAEAISNAKERNPEASIRVRPWKRRDGERG-GLLLVEVATASACFLQDNLFLWDGGAYPCEPFQASSNVQQ         |
| L1_ATLINE1_1_At_gi_12321249_(082-258)     | GLEVFEAMNSLWKNMVLKVLGRSVPVIAVLSKLRRELWPKIGAMHVVDLPRQYFMVRFESSEEEYLTA-LTGGPWRVFGSYLLVQAWSPDFDPMKDEIVTTPVWVRLSNIPLNLIHPSILMGITGGLGNLIKVDM-TTLTCERARFARVCVEVNLKPLKGTVMINEDRYFVAYEGLTNI  |
| L1Tx_Tx1L_Xl_gi_214844_(141-241)          | GGSYVPEPLEGLGTRVVLVSNVPPFLQDHLVPHLQALGELKSNMSRIPLGCKESRLRHVLSFKRQVQLL-LPRGQDTIEGSGFVPEFVLYKIFYSTEEVR                                                                                 |
| Type II NLR ORF1p                         |                                                                                                                                                                                      |
| L1_L13_Hs_gi_307098_(157-252)             | NLRLIGVPESDVENGTKLENTLQDIIQENFPNLRQANVQIQEIQRTPQRYSSRRATPRHIIVRFTKVEM-KEKMLRAAREKGRVTLKGGPIRLTVD                                                                                     |
| L1(Tx)_L1(Tx)_Nv_gi_149795606_(133-221)   | NLRRFFGIPEGTNEWNGTEEAVRDFIHKNLKAGPKQAGDVSFERVHRTGTEDKSSPRPIIAKFSFFKDK-EEVRSKLNLAGTSFGIAED                                                                                            |
| Cr1_Cr1_Nv_gi_149844706_(076-174)         | CLEFKGIPSLEDENTDLVIQVAQLAGVELDEDDISISHRLPAANNREWSYEGNVHPPSPPTIIAKFVR-RDIKDEIYKARFSLKDKTTQDLEHFNCTD                                                                                   |
| Cr1_Cr1_Sp_gi_111740418_(116-200)         | SVRIFGVPEKGEVTDQLVIKAVSDHLPCEISPSDIDRSHRSKGKPRPDAKKPRPILVKFTQYKKAAMM-KDRRLKGGGSIQED                                                                                                  |
| Type III NLR ORF1p                        |                                                                                                                                                                                      |
| CR1_Q_Ag_gi_432429_(193-294)              | PFTDRIWIRLSAYQRPSLWNKWSLSVKRRLATDDVIA YCLLRGVSVDMSMNWLSFKVRVPAILRDAAL-TPSTWPVGIGVREFFQSRQHDHQTSSPIATRNR                                                                              |
| CR1_T_Ag_gi_159642_(215-312)              | GIAEKVWLYFTNIKSHVSADDMRVWLKAVLPTDNDIVYRLTKKANLDMFSIFKVSIPKSLKDLAL-QSTIWPVSLTVREFVDRGLPKQRIHERARF                                                                                     |

Query sequences are labeled according to clade\_name\_species\_gi\_number\_(residue range).

**Table S3. Data collection, phasing, and refinement statistics**

|                                                | SeMet data (SAD)   |
|------------------------------------------------|--------------------|
| Data collection                                |                    |
| Wavelength, Å                                  | 0.97154            |
| Resolution range, Å                            | 56 - 1.4           |
| Space group                                    | P2 <sub>1</sub>    |
| Unit cell                                      |                    |
| dimensions (a / b / c), Å                      | 32.4 / 54.7 / 57.8 |
| angles (α / β / γ), °                          | 90 / 103.0 / 90    |
| R <sub>merge</sub> , %                         | 5.4 (53.3)*        |
| Completeness, %                                | 99.4 (96.6)*       |
| Completeness (anomalous), %                    | 97.9 (94.7)*       |
| Mean I/σ(I)                                    | 13.9 (2.8)*        |
| Number of unique reflections                   | 38608 (2754)*      |
| Multiplicity                                   | 3.7 (3.5)*         |
| Multiplicity (anomalous)                       | 1.9 (1.8)*         |
| Phasing                                        |                    |
| R <sub>cullis</sub>                            | 0.922              |
| Phasing power                                  | 0.60               |
| Mean figure of merit                           | 0.20               |
| Refinement                                     |                    |
| R <sub>cryst</sub> , %                         | 13.8               |
| R <sub>free</sub> , %                          | 18.5               |
| Number of molecules per asymmetric unit        |                    |
| protein molecules                              | 2                  |
| malonate ions                                  | 1                  |
| atoms (excluding water)                        | 1710               |
| water molecules                                | 298                |
| Average B-factor (anisotropic), Å <sup>2</sup> | 14.1               |
| Ramachandran plot                              |                    |
| most favored regions, %                        | 98.0               |
| disallowed regions, %                          | 0.0                |
| R.m.s.d. from ideal geometry                   |                    |
| bond lengths, Å                                | 0.018              |
| bond angles, °                                 | 1.69               |

\*Values in parentheses correspond to those in the outer resolution shell (1.40–1.44 Å).
